# Supplementary material for: Government Deleveraging and the Reverse Crowding-In Effect: Evidence from Subnational Debt and Government Contractors
Source: Atypon-hosted journal article supplement (doi:10.1287/mnsc.2024.05679), 2025-11-18
Supplement: mnsc.2024.05679.sm1.pdf [file mnsc.2024.05679.sm1.pdf]

# Online Appendix

## A Supplementary Analyses

Figure A1: Data Source

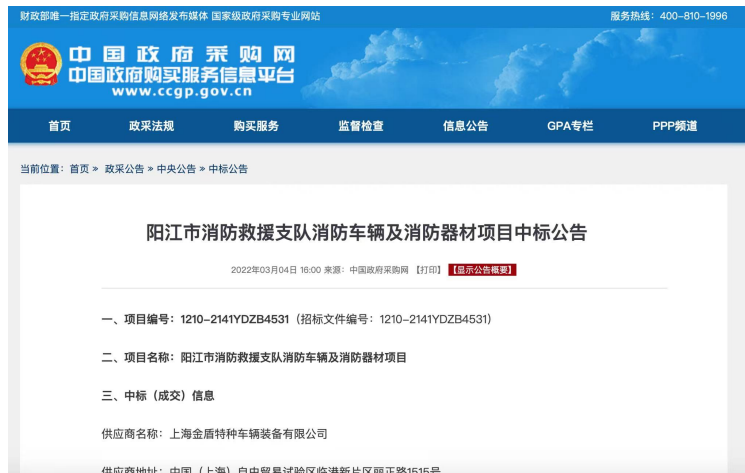

(A) Procurement website

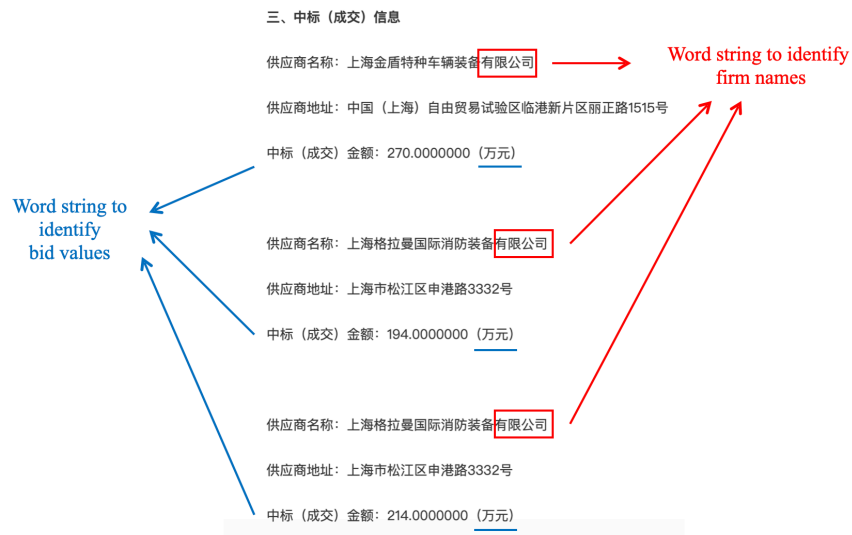

(B) Bid-winner information

Figure A2: M2 year-on-year Growth

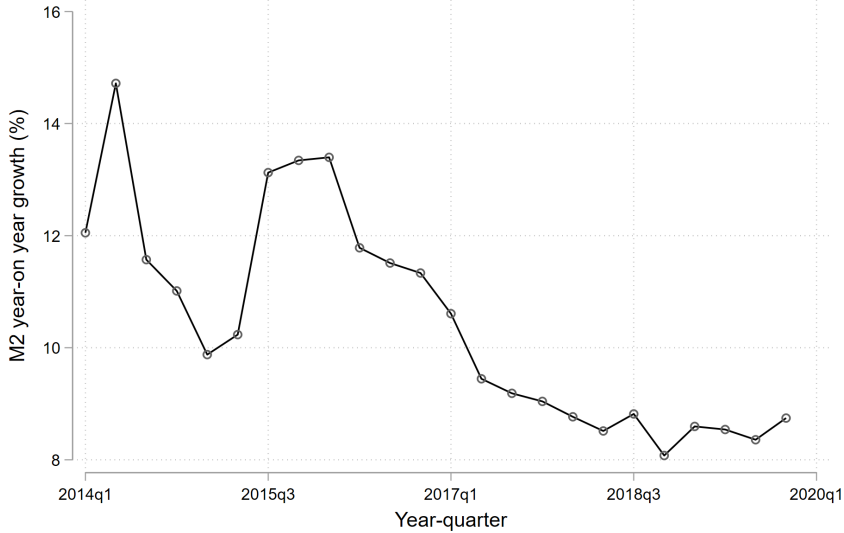

**Figure A3: Placebo Tests: Random Draws of the Treatment Group**

*Note:* This figure plots the regression results of placebo tests with the distribution (bars) of the regression coefficients and the corresponding p-values (gray squares) for the key variable ( $GPfirm_i^R \times post2017_t$ ). We keep the proportion of GP firms in the sample of non-SOEs and SOEs unchanged, then redistribute GP firms through random sampling and perform regression according to specification A3. We repeat random sampling and regression 500 times. The gray dashed lines mark the coefficients in the baseline regression.

$$A/R_{it} = \alpha + \beta GPfirm_i^R \times Post2017Q2_t + \eta X_{it-1} + \gamma_i + \gamma_t + \gamma_d * Quarter_t + \gamma_d * M2Growth_t + \epsilon_{it}$$

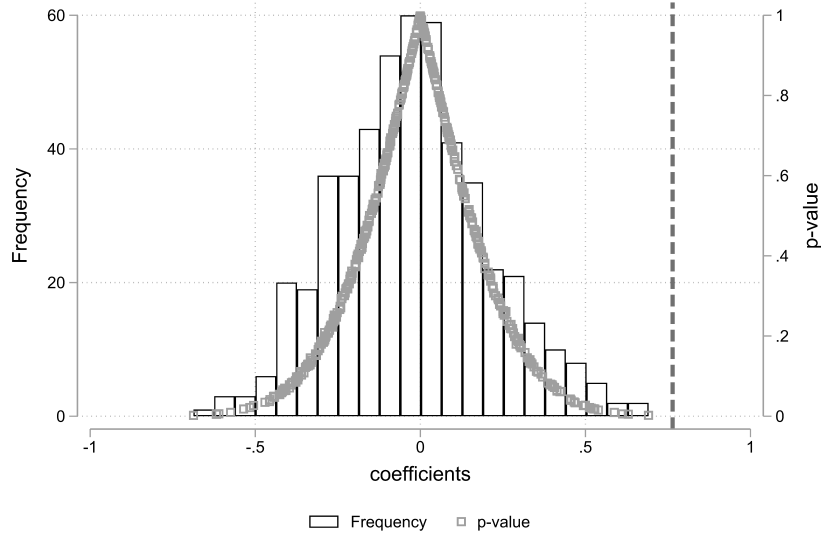

**(A) Placebo test - Non-SOE**

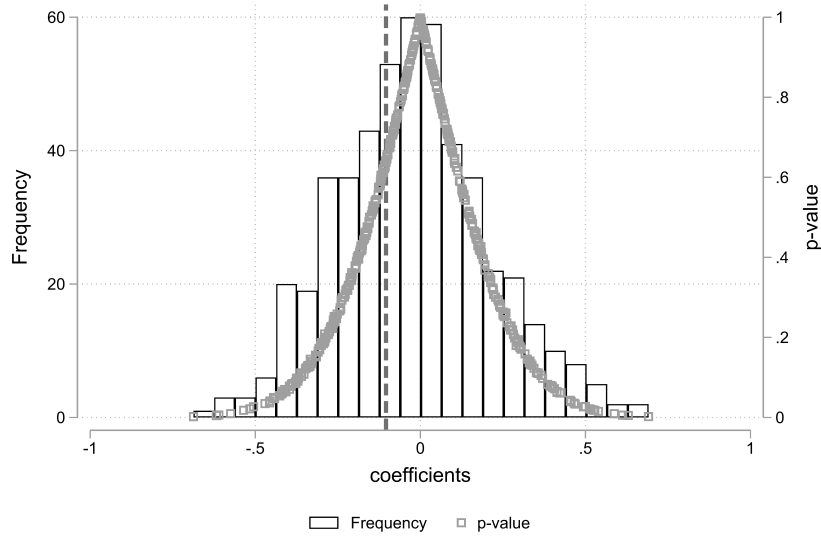

**(B) Placebo test - SOE**

### Figure A4: Share Pledging and Stock Market Returns

*Note:* This figure shows a binned scatter plot of the relationship between the annual stock returns and pledge ratios of controlling shareholders using panel data of A-share listed companies between 2014 and 2019. The y-axis is the annual stock return data obtained from CSMAR for firm  $i$  in year  $t$ . The x-axis is the year-end percentage of controlling shareholders' pledged equity ratio  $Pledgedratio_{it-1}$  for firm  $i$  in year  $t - 1$ .

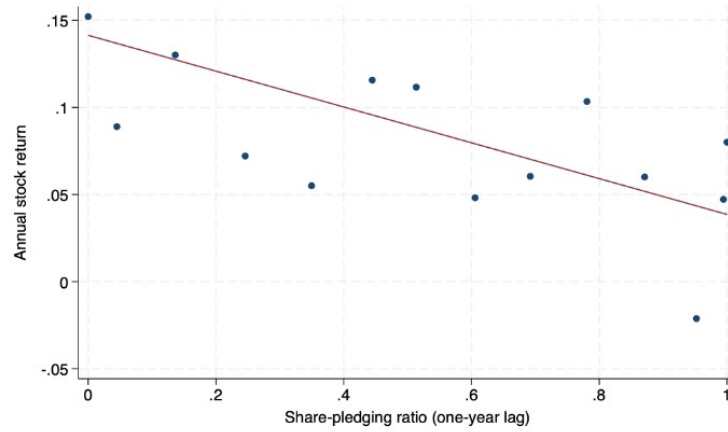

**Table A1: Summary Statistics: Firm-Quarter Panel, Non-SOEs vs. SOEs**

| VARIABLES                                                       | Non-SOE |        |       |        |       |       | SOE    |        |       |        |       |       |
|-----------------------------------------------------------------|---------|--------|-------|--------|-------|-------|--------|--------|-------|--------|-------|-------|
|                                                                 | N       | mean   | sd    | min    | p50   | max   | N      | mean   | sd    | min    | p50   | max   |
| <i>Firm Characteristics</i>                                     |         |        |       |        |       |       |        |        |       |        |       |       |
| Top5_gov_client                                                 | 37,387  | 0.0590 | 0.236 | 0      | 0     | 1     | 21,340 | 0.0755 | 0.264 | 0      | 0     | 1     |
| Mean_top5_gov_client                                            | 37,387  | 0.0629 | 0.333 | 0      | 0     | 4.667 | 21,340 | 0.0887 | 0.414 | 0      | 0     | 4.667 |
| <i>Dependent Variables</i>                                      |         |        |       |        |       |       |        |        |       |        |       |       |
| A/R (asset ratio,%)                                             | 37,387  | 13.82  | 9.735 | 0.326  | 12.36 | 33.83 | 21,340 | 9.646  | 9.364 | 0.326  | 6.272 | 33.83 |
| Payable (asset ratio,%)                                         | 33,819  | 8.087  | 5.731 | 0.912  | 6.796 | 23.43 | 19,566 | 9.779  | 6.714 | 0.912  | 8.141 | 23.43 |
| Inventory (asset ratio,%)                                       | 36,958  | 13.38  | 10.11 | 0.405  | 11.10 | 40.49 | 21,297 | 14.38  | 11.96 | 0.405  | 11.65 | 40.49 |
| Cash holding (asset ratio,%)                                    | 37,386  | 15.90  | 11.80 | 0.872  | 12.72 | 67.35 | 21,340 | 15.01  | 10.76 | 0.872  | 12.28 | 67.35 |
| Leverage (%)                                                    | 37,387  | 39.18  | 20.48 | 4.589  | 37.51 | 97.73 | 21,340 | 50.75  | 21.03 | 4.589  | 50.93 | 97.73 |
| Lev short (asset ratio,%)                                       | 37,387  | 31.77  | 16.39 | 7.264  | 30.12 | 67.45 | 21,340 | 37.95  | 17.27 | 7.264  | 36.72 | 67.45 |
| Lev short2 (asset ratio,%)                                      | 33,819  | 23.30  | 14.08 | 3.503  | 21.38 | 54.80 | 19,566 | 27.75  | 14.63 | 3.503  | 26.18 | 54.80 |
| Lev long (asset ratio,%)                                        | 36,780  | 7.023  | 8.074 | 0.0732 | 3.550 | 31.22 | 21,230 | 11.43  | 10.11 | 0.0732 | 8.336 | 31.22 |
| Invest (million RMB)                                            | 37,262  | 318.2  | 550.8 | 0      | 91.71 | 2,528 | 21,304 | 449.0  | 727.5 | 0      | 110.7 | 2,528 |
| Invest (asset ratio, %)                                         | 37,262  | 6.181  | 8.116 | 0      | 2.561 | 29.25 | 21,304 | 3.615  | 5.905 | 0      | 1.291 | 29.25 |
| Revenue (asset ratio,%)                                         | 37,384  | 14.68  | 10.62 | 0.439  | 12.45 | 65.33 | 21,340 | 15.86  | 12.20 | 0.439  | 12.73 | 65.33 |
| Revenue growth(%)                                               | 37,362  | 28.79  | 86.69 | -83.64 | 11.96 | 555.6 | 21,337 | 19.79  | 78.67 | -83.64 | 5.818 | 555.6 |
| Cost (asset ratio,%)                                            | 37,387  | 13.37  | 8.380 | 2.155  | 11.45 | 35.36 | 21,340 | 14.53  | 9.470 | 2.155  | 12.29 | 35.36 |
| Gross profit (asset ratio,%)                                    | 37,387  | 1.241  | 1.625 | -2.116 | 1.076 | 4.588 | 21,340 | 0.931  | 1.457 | -2.116 | 0.770 | 4.588 |
| ROA                                                             | 37,387  | 1.024  | 1.424 | -2.025 | 0.906 | 3.909 | 21,340 | 0.736  | 1.276 | -2.025 | 0.611 | 3.909 |
| ROE                                                             | 37,387  | 1.680  | 2.508 | -4.371 | 1.562 | 6.823 | 21,340 | 1.456  | 2.546 | -4.371 | 1.404 | 6.823 |
| <i>Control Variables</i>                                        |         |        |       |        |       |       |        |        |       |        |       |       |
| Size (ln, lag)                                                  | 37,387  | 21.91  | 1.062 | 20.18  | 21.81 | 24.98 | 21,340 | 22.77  | 1.265 | 20.18  | 22.68 | 24.98 |
| Fixed asset ratio (% , lag)                                     | 37,385  | 18.29  | 13.04 | 0.696  | 16.07 | 51.08 | 21,339 | 24.12  | 16.70 | 0.696  | 21.07 | 51.08 |
| Leverage (% , lag)                                              | 37,387  | 38.73  | 19.68 | 9.636  | 37.01 | 82.15 | 21,340 | 50.41  | 20.10 | 9.636  | 51.02 | 82.15 |
| Revenue ratio (% , lag)                                         | 37,387  | 14.19  | 8.721 | 1.974  | 12.45 | 36.59 | 21,340 | 15.09  | 9.768 | 1.974  | 12.77 | 36.59 |
| Revenue growth (% , lag)                                        | 37,387  | 19.23  | 40.51 | -47.43 | 12.38 | 116.2 | 21,340 | 11.89  | 37.15 | -47.43 | 5.888 | 116.2 |
| <i>Control Variables (Only with firm-year level variations)</i> |         |        |       |        |       |       |        |        |       |        |       |       |
| Top 10 share ratio (%)                                          | 37,387  | 56.47  | 14.44 | 23.33  | 57.36 | 92.29 | 21,304 | 57.54  | 15.45 | 23.33  | 57.27 | 92.29 |
| IDP director ratio (%)                                          | 37,387  | 38.01  | 5.597 | 20.00  | 36.36 | 75.00 | 21,300 | 37.30  | 5.823 | 23.08  | 35.71 | 80.00 |
| Employment (ln, lag)                                            | 37,379  | 7.436  | 1.215 | 1.946  | 7.415 | 12.34 | 21,302 | 8.144  | 1.395 | 2.890  | 8.120 | 13.21 |

**Table A2: Robustness Tests**

*Note:* This table reports the robustness test results of the impact of government deleveraging on firms' accounts receivable. We estimate the following DID model using a firm-quarter panel of non-financial firms listed on China's A-share stock market between 2014Q1 and 2019Q4:

$$A/R_{it} = \alpha + \beta GPfirm_i \times Post2017Q2_t + \eta X_{it-1} + \gamma_i + \gamma_t + \gamma_d * Quarter_t + \gamma_d * M2Growth_t + \epsilon_{it}$$

where  $A/R$  measures accounts receivable divided by total assets of firm  $i$  (with industry  $d$ ) in year-quarter  $t$ .  $Post2017Q2_t$  equals one for year-quarters in the post-deleveraging period between 2017Q2 and 2019Q4 and zero for the pre-deleveraging period between 2014Q1 and 2017Q1.  $GPfirm_i$  equals one if firm  $i$  obtained at least one GP contract between 2014 and 2016 and zero if firm  $i$  never obtained any GP contracts throughout our sample period.  $GPfirm12_i$  equals one if firm  $i$  had obtained GP contracts between 2010 and 2012 and zero if firm  $i$  had never obtained any GP contracts throughout our sample period. Initial firm size and leverage refer to the values at the beginning of our sample period in 2014.  $\mathbf{X}_{it-1}$  is a vector of control variables, including firm size ( $SizeL$ , log scale), employment ( $EmployL$ , log scale), financial leverage ( $LevL$ ), fixed asset ratio ( $FixedassetL$ , divided by total assets), total revenue ratio ( $RevenueL$ , divided by total assets), the growth rate of total revenue ( $RevGrowthL$ ), the shareholding ratio of top 10 major shareholders ( $Top10ShareL$ ) and the fraction of independent directors ( $IDPdirectorL$ ), all lagged by one period.  $EmployL$ ,  $Top10ShareL$  and  $IDPdirectorL$  vary at firm-year level and other control variables vary at firm-year-quarter level.  $\gamma_i$  and  $\gamma_t$  denote firm fixed effects and year-quarter fixed effects, respectively.  $\gamma_d * Quarter_t$  are industry-by-quarter fixed effects.  $\gamma_d * M2Growth_t$  are the industry times M2 growth fixed effects, with  $M2Growth_t$  measured by the quarterly year-on-year M2 growth released by the central bank.  $\epsilon_{it}$  represents the error term. Standard errors are adjusted for firm-level clustering and reported in parentheses. \*\*\*, \*\*, \* denote statistical significance levels at 1%, 5%, and 10%, respectively.

| VARIABLES                          | A/R (divided by assets,%) |                      |                      |                      |                      |
|------------------------------------|---------------------------|----------------------|----------------------|----------------------|----------------------|
|                                    | OLS<br>(1)                | OLS<br>(2)           | OLS<br>(3)           | OLS<br>(4)           | IV<br>(5)            |
| GPfirm × Post2017Q2                | 0.854***<br>(0.233)       |                      | 0.965***<br>(0.193)  |                      | 0.872**<br>(0.361)   |
| GPfirm12 × Post2017Q2              |                           |                      |                      | 0.675**<br>(0.280)   |                      |
| GPfirm × Post2016Q2                |                           | 0.552**<br>(0.241)   | -0.157<br>(0.205)    |                      |                      |
| Initial Firm Size × Post2017Q2     | -0.510***<br>(0.126)      | -0.478***<br>(0.126) | -0.508***<br>(0.126) | -0.410***<br>(0.141) | -0.433***<br>(0.142) |
| Initial Firm Leverage × Post2017Q2 | 0.018***<br>(0.006)       | 0.018***<br>(0.006)  | 0.018***<br>(0.006)  | 0.015**<br>(0.007)   | 0.015**<br>(0.007)   |
| Observations                       | 37,349                    | 37,220               | 37,220               | 28,853               | 28,853               |
| R-squared                          | 0.872                     | 0.871                | 0.872                | 0.868                | 0.060                |
| First Stage F                      |                           |                      |                      |                      | 1186.10              |
| Mean of D.V.                       | 13.82                     | 13.82                | 13.82                | 13.82                | 13.82                |
| Controls                           | YES                       | YES                  | YES                  | YES                  | YES                  |
| Firm FE                            | YES                       | YES                  | YES                  | YES                  | YES                  |
| Year-Quarter FE                    | YES                       | YES                  | YES                  | YES                  | YES                  |
| Industry × Quarter FE              | YES                       | YES                  | YES                  | YES                  | YES                  |
| Industry FE × M2Growth             | YES                       | YES                  | YES                  | YES                  | YES                  |

**Table A3: Government Deleveraging and Discretionary vs. Non-discretionary Spending**

*Note:* This table reports the impact of government deleveraging on different types of government spending: general fiscal expenditures, local investments, and government procurements. We estimate the following DID model using a city-year panel of 298 cities between 2014 and 2019:

$$Y_{ct} = \alpha + \beta HighRepayRatio_p \times Post2017_t + \eta \mathbf{X}_{ct-1} + \gamma_c + \gamma_t + \gamma_{pt} + \epsilon_{ct}$$

$Y_{ct}$  measures general-budget fiscal expenditures, urban investments, the number of government procurements, and the money value of government procurements of city  $c$  of province  $p$  in year  $t$ , all in natural log scale.  $HighRepayRatio_p$  equals one for cities in province  $p$  with an above-median average repayment ratio of MCBs issued in the post-deleveraging period (the high-repayment-pressure group) and zero otherwise (the low-repayment-pressure group).  $Post2017_t$  equals one for years in the post-deleveraging period between 2017 and 2019 and zero for the pre-deleveraging period between 2014 and 2016.  $\mathbf{X}_{ct-1}$  is a vector of control variables, including GDP, population, average wage, and fiscal revenue (all lagged by one year and in log scale).  $\gamma_c$ ,  $\gamma_t$ , and  $\gamma_{pt}$  denote city, year, and province-by-year fixed effects, respectively.  $\epsilon_{it}$  represents the error term. Standard errors are adjusted for firm-level clustering and reported in parentheses. \*\*\*, \*\*, \* denote statistical significance levels at 1%, 5%, and 10%, respectively.

| VARIABLES                        | Fiscal Expenditures | Urban Investments | Procurements         |                     |
|----------------------------------|---------------------|-------------------|----------------------|---------------------|
|                                  | (ln)                | (ln)              | (Number, ln)         | (Value, ln)         |
|                                  | (1)                 | (2)               | (3)                  | (4)                 |
| HighRepayRatio $\times$ Post2017 | -0.015<br>(0.011)   | -0.087<br>(0.103) | -0.591***<br>(0.109) | -0.453**<br>(0.182) |
| Observations                     | 1,613               | 1,561             | 1,573                | 1,573               |
| R-squared                        | 0.987               | 0.882             | 0.906                | 0.777               |
| Mean of D.V. (Level)             | 35,744              | 5,294             | 936.6                | 2,850               |
| Controls                         | YES                 | YES               | YES                  | YES                 |
| City FE                          | YES                 | YES               | YES                  | YES                 |
| Year FE                          | YES                 | YES               | YES                  | YES                 |
| Province $\times$ Year Trend     | YES                 | YES               | YES                  | YES                 |

**Table A4: Mechanism: Firm’s Dependence on the Government as Buyers**

*Note:* This table reports the impact of local government deleveraging on non-SOE firms’ working capital management. We use a firm-quarter panel of non-financial firms listed on China’s A-share stock market between 2014 and 2019:

$$A/R_{it} = \alpha + \beta Top5ClientGov_i \times Post2017Q2_t + \eta \mathbf{X}_{it-1} + \gamma_i + \gamma_t + \gamma_d * Quarter_t + \gamma_d * M2Growth_t + \epsilon_{it}$$

$A/R_{it}$  measures accounts receivable divided by total assets of firm  $i$  (with industry  $d$ ) in year-quarter  $t$ .  $Post2017Q2_t$  equals one for year-quarters in the post-deleveraging period between 2017Q2 and 2019Q4 and zero for the pre-deleveraging period between 2014Q1 and 2017Q1.  $Top5ClientGov\_Dummy_i$  equals one if firm  $i$  revealed certain government departments as its top 5 clients between 2014 and 2016 and zero otherwise.  $Top5ClientGov\_Number_i$  denotes the average number of government departments as its top 5 clients between 2014 and 2016. The first and second columns retain all samples. The third and fourth columns retain only samples that disclose information about the top five customers. The fifth and sixth columns retain only samples that disclose specific customer information, i.e., samples that disclose anonymous information such as “Customer 1” are deleted.  $\mathbf{X}_{it-1}$  is a vector of control variables, including firm size ( $SizeL$ , log scale), employment ( $EmployL$ , log scale), financial leverage ( $LevL$ ), fixed asset ratio ( $FixedassetL$ , divided by total assets), total revenue ratio ( $RevenueL$ , divided by total assets), the growth rate of total revenue ( $RevGrowthL$ ), the shareholding ratio of top 10 major shareholders ( $Top10ShareL$ ) and the fraction of independent directors ( $IDPdirectorL$ ), all lagged by one period.  $EmployL$ ,  $Top10ShareL$  and  $IDPdirectorL$  vary at the firm-year level and other control variables vary at the firm-year-quarter level.  $\gamma_i$  and  $\gamma_t$  denote firm fixed effects and year-quarter fixed effects, respectively.  $\gamma_d * Quarter_t$  are industry-by-quarter fixed effects.  $\gamma_d * M2Growth_t$  are the industry times M2 growth fixed effects, with  $M2Growth_t$  measured by the quarterly year-on-year M2 growth released by the central bank.  $\epsilon_{it}$  represents the error term. Standard errors are adjusted for firm-level clustering and reported in parentheses. \*\*\*, \*\*, \* denote statistical significance levels at 1%, 5%, and 10%, respectively.

| VARIABLES                         | A/R (divided by assets,%) |          |                      |         |                    |         |
|-----------------------------------|---------------------------|----------|----------------------|---------|--------------------|---------|
|                                   | Full Sample               |          | Customers Disclosure |         | Specific Customers |         |
|                                   | (1)                       | (2)      | (3)                  | (4)     | (5)                | (6)     |
| Top5ClientGov_Dummy × Post2017Q2  | 0.839*                    |          | 0.845*               |         | 1.006              |         |
|                                   | (0.452)                   |          | (0.484)              |         | (0.706)            |         |
| Top5ClientGov_Number × Post2017Q2 |                           | 0.685*** |                      | 0.522** |                    | 0.592   |
|                                   |                           | (0.242)  |                      | (0.253) |                    | (0.385) |
| Observations                      | 37,373                    | 37,373   | 28,640               | 28,640  | 5,919              | 5,919   |
| R-squared                         | 0.872                     | 0.872    | 0.875                | 0.875   | 0.894              | 0.894   |
| Mean of D.V.                      | 13.82                     | 13.82    | 13.84                | 13.84   | 11.88              | 11.88   |
| Controls                          | YES                       | YES      | YES                  | YES     | YES                | YES     |
| Firm FE                           | YES                       | YES      | YES                  | YES     | YES                | YES     |
| Year-Quarter FE                   | YES                       | YES      | YES                  | YES     | YES                | YES     |
| Industry × Quarter FE             | YES                       | YES      | YES                  | YES     | YES                | YES     |
| Industry FE × M2 Growth           | YES                       | YES      | YES                  | YES     | YES                | YES     |

**Table A5: Impacts on Leverage**

*Note:* This table reports regression results showing the impact of government deleveraging on non-SOE firms' leverage. We use a firm-quarter panel of non-financial firms listed on China's A-share stock market between 2014 and 2019:

$$Y_{it} = \alpha + \beta GPfirm_i \times Post2017Q2_t + \eta \mathbf{X}_{it-1} + \gamma_i + \gamma_t + \gamma_d * Q_t + \gamma_d * M2Growth_t + \epsilon_{it}$$

$Y_{it}$  include total liabilities divided by total assets (*Total*), current liabilities divided by total assets (*Current*), current liabilities minus accounts payable divided by total assets (*Current - A/P*), and non-current liabilities divided by total assets (*Long*) of firm  $i$  (with industry  $d$ ) in year-quarter  $t$ .  $Post2017Q2_t$  equals one for year-quarters in the post-deleveraging period between 2017Q2 and 2019Q4 and zero for the pre-deleveraging period between 2014Q1 and 2017Q1.  $GPfirm_i$  equals one if firm  $i$  obtained at least one GP contract between 2014 and 2016 and zero if firm  $i$  never obtained any GP contracts throughout our sample period.  $\mathbf{X}_{it-1}$  is a vector of control variables, including firm size (*SizeL*, log scale), employment (*EmployL*, log scale), financial leverage (*LevL*), fixed asset ratio (*FixedassetL*, divided by total assets), total revenue ratio (*RevenueL*, divided by total assets), the growth rate of total revenue (*RevGrowthL*), the shareholding ratio of top 10 major shareholders (*Top10ShareL*) and the fraction of independent directors (*IDPdirectorL*), all lagged by one period. *EmployL*, *Top10ShareL* and *IDPdirectorL* vary at the firm-year level and other control variables vary at the firm-year-quarter level.  $\gamma_i$  and  $\gamma_t$  denote firm fixed effects and year-quarter fixed effects, respectively.  $\gamma_d * Q_t$  are industry-by-quarter fixed effects.  $\gamma_d * M2Growth_t$  are the industry times M2 growth fixed effects, with *M2Growth<sub>t</sub>* measured by the quarterly year-on-year M2 growth released by the central bank.  $\epsilon_{it}$  represents the error term. Standard errors are adjusted for firm-level clustering and reported in parentheses. \*\*\*, \*\*, \* denote statistical significance levels at 1%, 5%, and 10%, respectively.

| VARIABLES              | Liability-to-Asset Ratios |                     |                    |                      |
|------------------------|---------------------------|---------------------|--------------------|----------------------|
|                        | Total                     | Current             | Current-A/P        | Long                 |
|                        | (1)                       | (2)                 | (3)                | (4)                  |
| GPfirm × Post2017Q2    | 0.560<br>(0.585)          | 1.308***<br>(0.490) | 1.066**<br>(0.423) | -0.789***<br>(0.300) |
| Observations           | 37,373                    | 37,373              | 33,804             | 36,756               |
| R-squared              | 0.825                     | 0.795               | 0.770              | 0.689                |
| Mean of D.V.           | 39.18                     | 31.77               | 23.30              | 7.02                 |
| Controls               | YES                       | YES                 | YES                | YES                  |
| Firm FE                | YES                       | YES                 | YES                | YES                  |
| Year-Quarter FE        | YES                       | YES                 | YES                | YES                  |
| Industry × Quarter FE  | YES                       | YES                 | YES                | YES                  |
| Industry FE × M2Growth | YES                       | YES                 | YES                | YES                  |

**Table A6: Impact on Employment**

*Note:* This table reports regression results showing the impact of government deleveraging on firms' employment using a firm-year panel data of non-financial firms listed on China's A-share stock market between 2014 and 2019:

$$Employ_{i(d)t} = \alpha + \beta GPfirm_i \times post2017_t + \eta X_{it-1} + \gamma_i + \gamma_t + \epsilon_{it}$$

$Employ_{i(d)t}$  is employment divided by the total assets (# per billion yuan) of firm  $i$  (with industry  $d$ ) in year  $t$ .  $Post2017_t$  equals 0 for pre-policy periods between 2014 and 2016 and takes the value of 1 for post-policy periods between 2017 and 2019.  $GPfirm_i$  equals one if firm  $i$  obtained at least one GP contract between 2014 and 2016 and zero if firm  $i$  never obtained any GP contracts throughout our sample period. The vector of control variables  $X_{it-1}$  include lagged values of firm size ( $SizeL$ ), lagged values of firm total employment (logged) ( $EmployL$ ), financial leverage ( $LevL$ ), fixed asset ratio ( $FixedassetL$ , divided by total assets), total revenue ratio ( $RevenueL$ , divided by total assets), the growth rate of total revenue ( $RevGrowthL$ ), the shareholding ratio of top 10 major shareholders ( $Top10ShareL$ ) and the fraction of independent directors ( $IDPdirectorL$ ).  $\gamma_i$  and  $\gamma_t$  denote firm fixed effects and year fixed effects, respectively.  $\epsilon_{it}$  represents the error term. Standard errors are adjusted for firm-level clustering and reported in parentheses. \*\*\*, \*\*, \* denote statistical significance levels at 1%, 5%, and 10%, respectively.

| VARIABLES         | Non-SOE            |                    |
|-------------------|--------------------|--------------------|
|                   | (1)                | (2)                |
|                   | Employment         |                    |
| GPfirm × Post2017 | -6.602<br>(13.221) | -8.211<br>(10.769) |
| Observations      | 8,968              | 8,965              |
| R-squared         | 0.865              | 0.885              |
| Mean of dep. var. | 711.678            | 711.678            |
| Controls          | NO                 | YES                |
| Firm FE           | YES                | YES                |
| Year FE           | YES                | YES                |

## B Matching GP Contracts with Listed Firms

We adopt natural language processing (NLP) methods to address two empirical challenges in analyzing the unstructured text of procurement announcements.

First, to match procurement contracts with corresponding local governments, we use the CPCA package to extract administrative information from the title of each announcement, which usually includes the three-tiered provincial-prefecture-county name of the purchasing government. When our algorithm fails to identify a province name, it is usually because the procurement announcement came from the central government. There are 411,471 procurement announcements for which we cannot identify a province, accounting for approximately 11% of our observations.

Second, to match publicly traded firms with firms winning GP orders, we use the spaCy package to perform named entity detection to extract firm names from GP contracts. We also extract the date and budgetary expenditure amounts of each GP announcement. We successfully identify approximately 810,000 GP firm names from 85% of the procurement announcements. We then adopt both exact and fuzzy matching methods to match firms. While we have the full names of all listed firms and their affiliates, the exact names may not appear in the GP announcements, especially when the winning bidder is an affiliated company. To address discrepancies in firm names, we match procurement firms with listed firms with exact and fuzzy matching. We develop a customized fuzzy matching method based on Chinese word segmentation by first building a dictionary including common suffixes of company names, such as “Ltd.” (*youxian gongsi*) or “Co. Ltd.” (*gufen youxian gongsi*) in Chinese. We then segment companies’ names and compare the differences between the core parts using three indicators, as shown by an example in Table B1. We keep all data for which the former-in-latter indicator or the latter-in-former indicator is one. We manually check the matching results and drop observations that are incorrectly matched via

the industrial and commercial registration data query system provided by QICHACHA (<https://www.qcc.com/>).

**Table B1: An Example of Fuzzy Matching**

| Procurement Firms |                  | Listed Firms      |
|-------------------|------------------|-------------------|
| Original          | 沃森生物技术有限公司       | 云南沃森生物技术股份有限公司    |
| Segmentation      | 沃森生物技术 \ 有限公司    | 云南沃森生物技术 \ 股份有限公司 |
| Core Part         | 沃森生物技术           | 云南沃森生物技术          |
| Similarity Score  | Former in Latter | Latter in Former  |
| 83.86             | 1                | 0                 |

## C A Case Study: Beijing Orient Landscape

A prominent example of the reverse crowding-in effect amid government deleveraging is the case of Beijing Orient Landscape and Environment Co., Ltd., (henceforth Orient Landscape), a Beijing-based company principally engaged in landscape construction and urban ecosystem repair projects. Orient Landscape's business is closely associated with infrastructure investments made by local governments in the form of public-private partnership (PPP) projects as a part of GP activities. According to its annual reports, Orient Landscape successfully bid on 50 PPP projects in 2017, amounting to a total of 71.6 billion RMB.

The GP projects come with substantial financial pressure because Orient Landscape is responsible for financing the construction of these projects. For instance, Orient Landscape won a 458.5 million RMB bid for a PPP project involving the development of rural tourism in Nanchong, Sichuan Province. According to a news report, Orient Landscape would hold a controlling stake of 88 percent in the project and would be responsible for the financing, operation, and overall management of the project. Thus, the financial health of Orient Landscape hinges on payments from local governments and external financing capacity backed by government projects.

Delayed payments from local governments eventually created a heavy financial burden on Orient Landscape. Orient Landscape noted in its 2017 annual report that "even though local governments have relatively high credit ratings, the accounts receivable collection efficiency is inevitably affected by factors such as the local government budget, financial conditions, and local government debt levels. The speed of capital turnover is related to local government office efficiency. There is a risk of collection delay due to settlement delay." In 2018, the company disclosed total accounts receivable of 8.9 billion RMB, representing 21.3% of its total assets. Making matters even worse, 60% of

these accounts receivable would not be paid.<sup>31</sup> In addition to its increasing accounts receivable and deteriorated cash holdings, Orient Landscape experienced setbacks in the bond market and the stock market, which sent a public signal that the company was in financial distress. A landmark event was the failure of Orient Landscape’s bond issuance plan in May 2018, which was intended to raise 1 billion RMB but ultimately raised only 5% of its target.

Following the announcement of the failed issuance, Orient Landscape’s stock plunged nearly 9% in afternoon trading. Although the stock price later recovered some of its losses, the fluctuations were costly given that Qiaonv He, founder and chairperson of Orient Landscape, had pledged over 90% of her shares in the company. China Securities Regulatory Commission (CSRC), the regulator, advised creditors of Orient Landscape not to engage in forced sales of pledged shares. The distress of Orient Landscape was finally resolved in August 2018, when the SASAC of Beijing’s Chaoyang District injected liquidity into Orient Landscape in exchange for controlling rights of the company, changing its ownership from private to state-owned.

## D Calculation of the Average Product of Capital (APK)

We calculate the APK of firms following the procedure provided by [Jurzyk and Ruane \(2021\)](#):

### 1. Calculation of Value-Added

$$\begin{aligned} \text{Value Added}_{i(s)t} &= \text{Total Revenues}_{i(s)t} - \text{Intermediate Inputs}_{i(s)t} \\ &= \text{Total Revenues}_{i(s)t} - (\text{Total Operating Costs}_{i(s)t} - \text{Labor Costs}_{i(s)t}) \end{aligned}$$

$$\text{Labor Costs}_{i(s)t} = \text{Employment}_{i(s)t} * \text{Average urban wages}_{st}$$

---

<sup>31</sup>For instance, one of its largest clients, the Management Committee of Binzhou Economic Development Zone, paid only 13 million of its total of 1.5 billion in unpaid procurements between 2014 and 2018.

where firm  $i$  in sector  $s$  in year  $t$  has Value Added $_{i(s)t}$ . Data for Total Revenues $_{i(s)t}$ , Employment $_{i(s)t}$  and Total Operating Costs $_{i(s)t}$  come from CSMAR, and data for Average urban wages $_{st}$  come from CEIC (<https://www.ceicdata.com>).

2. Calculation of the APK

$$\text{APK}_{i(s)t} = \frac{\text{Value-added}_{i(s)t}}{K_{i(s)t}}$$

where firm  $i$  in sector  $s$  in year  $t$  has  $\text{APK}_{i(s)t}$ . We use fixed assets as our measure of capital  $K_{i(s)t}$ , and data for  $K_{i(s)t}$  come from CSMAR.
